# Supplementary material for: Size-controlled template synthesis of metal-free germanium nanowires
Source: Royal Society of Chemistry journal article supplement (doi:10.1039/c1jm12460a), 2011-01-01
Supplement: c1jm12460a.pdf [file c1jm12460a.pdf]

**Supporting Information for:**

**Size-Controlled Template Synthesis of  
Metal-free Germanium Nanowires**

*Zhenyu Yang,<sup>a</sup> and Jonathan G. C. Veinot<sup>a,\*</sup>*

a Department of Chemistry, University of Alberta, Edmonton, Alberta, Canada T6G  
2G2. Fax: 780-492-8231; Tel: 780-492-7206.

\* Corresponding authors e-mail: [jveinot@ualberta.ca](mailto:jveinot@ualberta.ca)

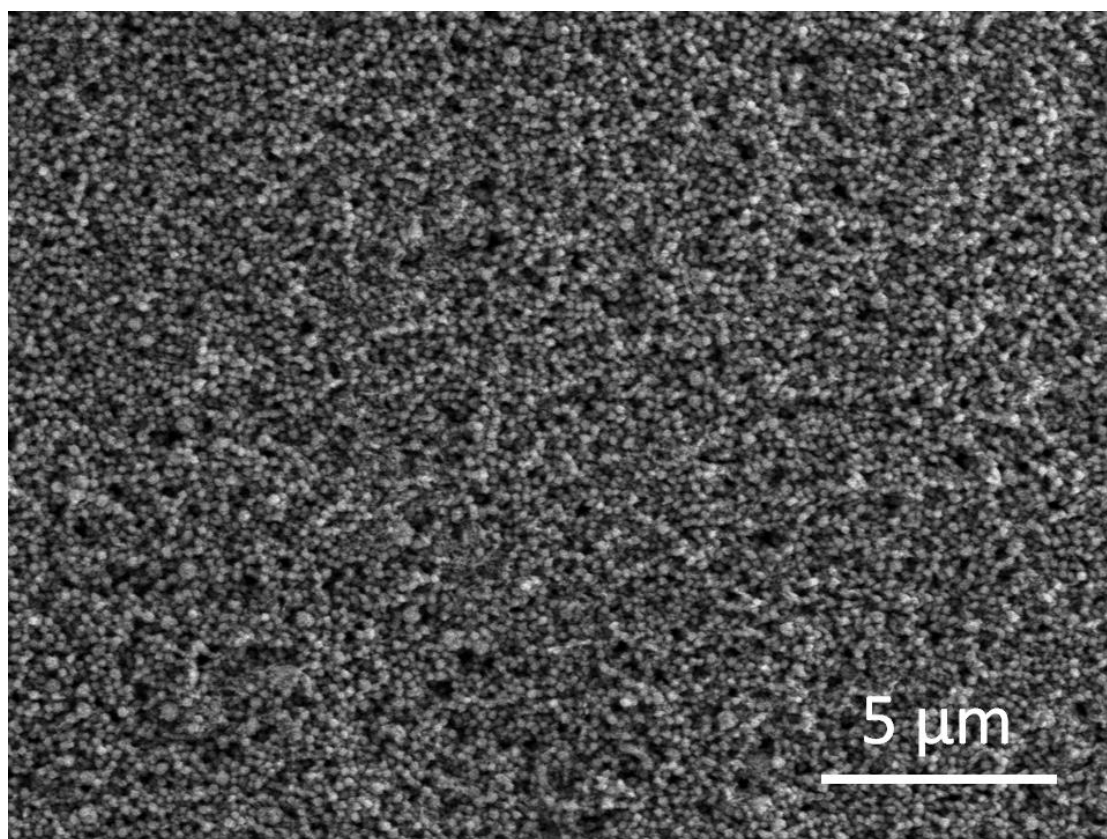

**Figure S1.** SEM image of GeO<sub>2</sub>-like composite with narrow size distributions drop-coated on top of AAO.

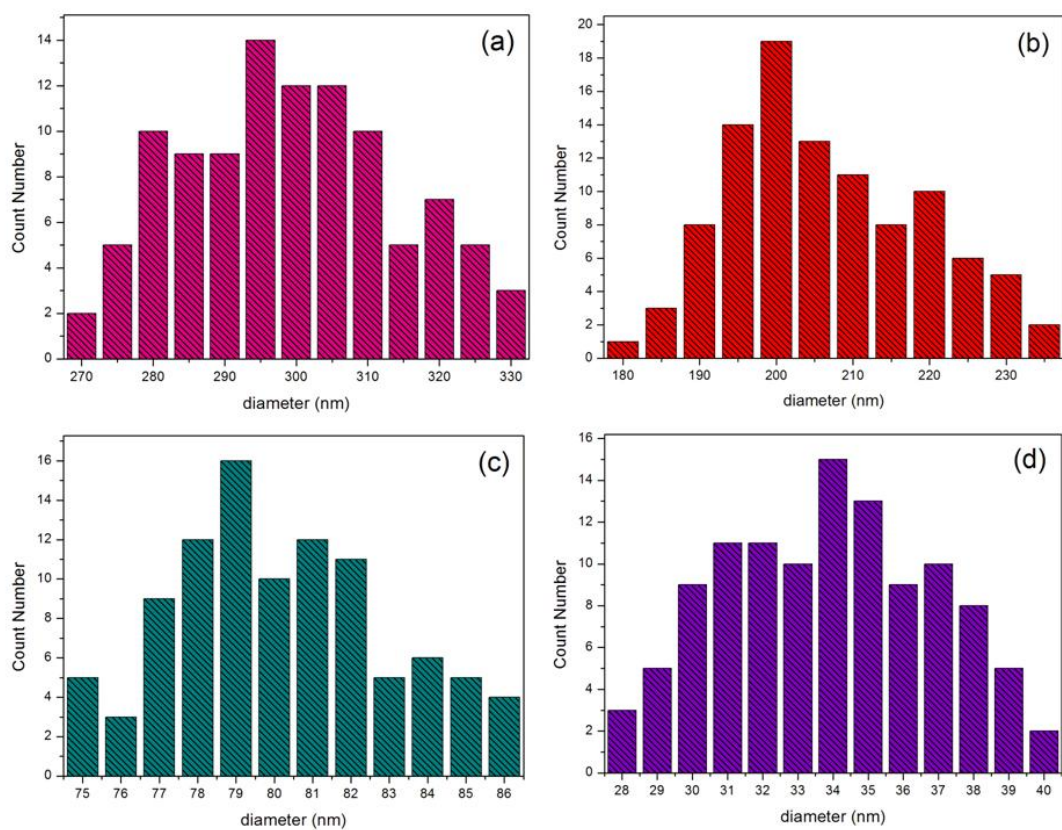

**Figure S2.** Distributions of the diameter of liberated Ge-NWs (300 nm (a), 200 nm (b), 80 nm (c) and 40 nm (d)).
